# Supplementary material
Source: ML conference proceedings conference paper supplement (https://openaccess.thecvf.com/content/CVPR2026/html/Huang_SemiGDA_Generative_Dual-distribution_CVPR_2026_paper.html)
Supplement: Supplementary file 1 [file Huang_SemiGDA_Generative_Dual-distribution_CVPR_2026_supplemental.pdf]

# SemiGDA: Generative Dual-distribution Alignment for Semi-Supervised Medical Image Segmentation

## Supplementary Material

### 001 A. More Experiment

#### 002 A.1. Experiments on Colonoscopy Datasets

003 **Dataset description:** In the endoscopic dataset, two  
004 additional unseen datasets are included, namely CVC-  
005 ColonDB [14] and ETIS [13]. Note that, consistent with the  
006 previous settings [6], the weights used for testing here are  
007 those trained on the two seen datasets (CVC-ClinicDB [1]  
008 and Kvasir [7]) in the main text. The number of test samples  
009 in these two datasets is 380 and 196, respectively.

010 **Quantitative and Qualitative Results:** Tab. 1 reports  
011 the quantitative results on two unseen endoscopic datasets,  
012 CVC-ColonDB and ETIS. As observed, with only 10%  
013 of annotations, our method achieves increases of 10.18%  
014 and 7.65% in the Dice and IoU metrics, respectively, com-  
015 pared to the second-best method (UnCo). Similarly, on the  
016 ETIS dataset, the advantage of our method becomes even  
017 more pronounced with limited annotations. This demon-  
018 strates that generative-based methods outperform discrimi-  
019 native segmentation methods under low-annotation settings.  
020 Additionally, although this advantage decreases at the 30%  
021 annotation level, our method still achieves the best perfor-  
022 mance across all metrics. As shown in Fig. 2, our method  
023 effectively captures the full shape of the target, particularly  
024 in small targets and along contour boundaries.

#### 025 A.2. Experiments on Thyroid Datasets

026 **Dataset description:** The thyroid dataset is composed of  
027 three subsets: TN3K [4], TG3K [17], and DDTI [12]. The  
028 training and validation sets are derived from 2, 879 images  
029 of TN3K and 3, 585 images of TG3K, comprising 6, 142  
030 images for training and 322 images for validation. The test  
031 dataset is constructed using images from TN3K and DDTI,  
032 totaling 614 images.

033 **Comparison with State-of-the-Art Methods:** Tab. 2  
034 presents the comparative results on the ultrasound task with  
035 other semi-supervised medical image segmentation meth-  
036 ods, where DDTI serves as the unseen test set. It can be  
037 seen that our model achieves state-of-the-art performance  
038 across all metrics. Notably, on the TN3K test set, our  
039 method exhibits significantly superior performance com-  
040 pared to others. For instance, with 30% labeled data on  
041 the TN3k dataset, our method improves the Dice coeffi-  
042 cient from 80.73% to 83.57% and the IoU from 71.41% to  
043 72.21%, compared to the second-best method. Moreover,  
044 Fig. 2 shows visual results of different semi-supervised  
045 medical image segmentation methods. It can be observed

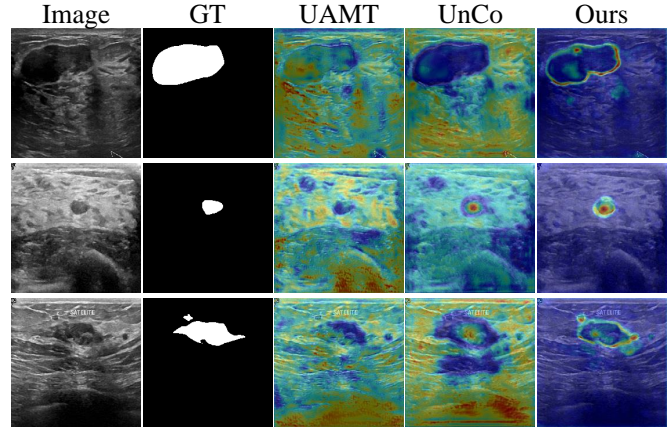

Figure 1. Heatmap comparison with other semi-supervised methods on the BUSI dataset.

that our model accurately identifies and segments the nod- 046  
ule regions, while other methods frequently struggle with 047  
inaccuracies in segmentation fragments. 048

### 049 B. More Model Analysis

050 As shown in the heatmap in Fig. 1, our method demon- 051  
strates clear advantages in target region focusing and 052  
boundary accuracy across large, small, and irregular targets. 053  
This confirms that our generative-based semi-supervised 054  
framework effectively captures fine-grained boundary fea- 055  
tures, crucial for medical image segmentation and clinical 056  
diagnosis. Additionally, its ability to reduce background 057  
interference and learn feature distributions from unlabeled 058  
data further supports the effectiveness of our method in fea- 059  
ture alignment and consistency constraint design.

### 060 C. More Implementation Details

061 Our method employs a two-stage training paradigm. The 062  
first stage is specifically designed to warm up the Dual- 063  
distribution Alignment Module (DAM). Given that DAM 064  
involves complex distribution-matching operations, direct 065  
end-to-end training is prone to optimization oscillations due 066  
to unstable initial parameters. In the second stage, pre- 067  
trained weights are loaded for fine-tuning, which effectively 068  
enhances the robustness of the generative model. For the 069  
Consistency-Driven Skip Adapter strategy, the maximum 070  
number of  $N_f$  is set to 5, considering the original model 071  
architecture and avoiding excessive increases in the number 072  
of learnable parameters. We adopt the PolyLR learning rate 073  
scheduling strategy.

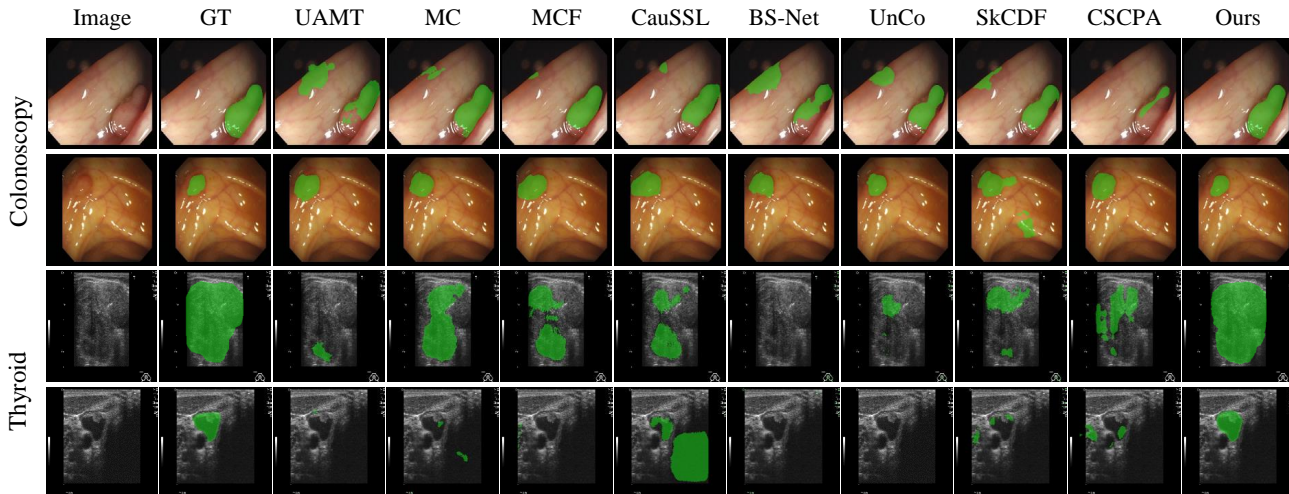

Figure 2. Visual comparisons of state-of-the-art medical segmentation methods on the colonoscopy and thyroid datasets.

Table 1. Quantitative results on the ETLs and CVC-ColonDB datasets.

| Methods                  | 10% labeled  |              |             | 30% labeled  |              |             | 10% labeled  |              |             | 30% labeled  |              |             |
|--------------------------|--------------|--------------|-------------|--------------|--------------|-------------|--------------|--------------|-------------|--------------|--------------|-------------|
|                          | Dice (%)     | IoU (%)      | 95HD        |
| UA-MT [18] [MICCAI'19]   | 41.34        | 33.49        | 5.72        | 59.43        | 51.30        | 4.74        | 31.84        | 25.59        | 4.96        | 41.18        | 34.80        | 4.64        |
| DTC [9] [AAAI'21]        | 35.35        | 27.17        | 6.10        | 54.75        | 46.18        | 5.05        | 26.74        | 20.48        | 6.05        | 44.83        | 37.72        | 4.40        |
| MC-Net [16] [MICCAI'21]  | 55.69        | 46.53        | 5.24        | 63.65        | 55.38        | 4.71        | 39.88        | 33.15        | 4.81        | 49.51        | 41.69        | 4.74        |
| URPC [10] [MIA'22]       | 46.84        | 38.98        | 5.55        | 60.00        | 51.89        | 4.78        | 38.98        | 32.92        | 4.78        | 45.00        | 36.75        | 4.89        |
| MCF [15] [CVPR'23]       | 48.72        | 40.60        | 5.25        | 63.24        | 55.05        | 4.64        | 31.13        | 25.81        | 4.84        | 48.46        | 41.28        | 4.33        |
| CauSSL [11] [ICCV'23]    | 48.51        | 40.89        | 5.24        | 57.84        | 49.36        | 4.95        | 30.93        | 24.96        | 5.18        | 32.97        | 27.41        | 5.42        |
| CDMA [21] [MICCAI'23]    | 44.88        | 35.72        | 5.77        | 59.39        | 49.10        | 5.20        | 37.23        | 28.85        | 4.87        | 38.29        | 29.37        | 6.07        |
| BS-Net [5] [TMI'24]      | 43.88        | 36.57        | 5.43        | 55.89        | 48.15        | 4.87        | 31.77        | 26.26        | 5.28        | 38.08        | 31.65        | 4.91        |
| PMT [3] [ECCV'24]        | 47.21        | 39.47        | 4.74        | 58.63        | 51.12        | 4.53        | 29.09        | 23.90        | 4.90        | 39.34        | 32.90        | 4.67        |
| VCLIPSeg [8] [MICCAI'24] | 50.19        | 42.19        | 4.79        | 62.02        | 54.34        | 4.67        | 37.92        | 31.14        | 4.83        | 45.89        | 38.99        | 4.46        |
| UnCo [19] [TMI'25]       | 57.62        | 50.64        | 4.64        | 62.18        | 55.04        | 4.45        | 37.73        | 32.92        | 4.61        | 42.04        | 36.34        | 4.27        |
| SKCDF [20] [CVPR'25]     | 45.82        | 37.51        | 4.55        | 58.02        | 47.58        | 4.79        | 35.02        | 28.34        | 4.82        | 36.50        | 30.14        | 5.15        |
| CSCPA [2] [CVPR'25]      | 55.66        | 46.80        | 4.50        | 68.70        | 60.22        | 4.06        | 38.86        | 32.08        | 4.68        | 52.58        | 44.72        | 4.25        |
| <b>Ours</b>              | <b>67.80</b> | <b>58.29</b> | <b>4.47</b> | <b>71.81</b> | <b>63.38</b> | <b>4.02</b> | <b>56.77</b> | <b>48.26</b> | <b>4.52</b> | <b>59.86</b> | <b>53.10</b> | <b>4.11</b> |

Table 2. Quantitative results on the thyroid datasets.

| Methods                  | 10% labeled  |              |             | 30% labeled  |              |             | 10% labeled  |              |             | 30% labeled  |              |             |
|--------------------------|--------------|--------------|-------------|--------------|--------------|-------------|--------------|--------------|-------------|--------------|--------------|-------------|
|                          | Dice (%)     | IoU (%)      | 95HD        |
| UA-MT [18] [MICCAI'19]   | 34.96        | 27.31        | 6.73        | 49.76        | 39.85        | 6.07        | 74.73        | 64.23        | 4.83        | 78.42        | 69.16        | 4.53        |
| DTC [9] [AAAI'21]        | 27.13        | 19.67        | 7.35        | 38.53        | 28.05        | 6.87        | 62.67        | 50.50        | 5.61        | 64.48        | 51.66        | 5.74        |
| MC-Net [16] [MICCAI'21]  | 29.42        | 23.12        | 7.15        | 45.36        | 36.60        | 6.20        | 71.45        | 60.72        | 5.28        | 78.04        | 68.72        | 4.65        |
| URPC [10] [MIA'22]       | 31.37        | 24.23        | 6.88        | 56.01        | 45.26        | 5.92        | 74.42        | 64.17        | 4.88        | 79.19        | 70.00        | 4.56        |
| MCF [15] [CVPR'23]       | <b>57.69</b> | <b>46.84</b> | <b>5.71</b> | 55.09        | 44.08        | 5.97        | 74.50        | 64.46        | 4.79        | 78.04        | 68.79        | 4.43        |
| CauSSL [11] [ICCV'23]    | 41.88        | 32.76        | 6.52        | 46.12        | 36.51        | 6.22        | 70.89        | 60.22        | 5.17        | 73.93        | 63.63        | 4.97        |
| CDMA [21] [MICCAI'23]    | 46.42        | 36.17        | 6.28        | 54.68        | 42.48        | 6.34        | 72.97        | 61.54        | 5.12        | 76.24        | 65.60        | 4.81        |
| BS-Net [5] [TMI'24]      | 31.41        | 24.82        | 6.74        | 40.55        | 32.42        | 6.33        | 73.70        | 64.22        | 4.77        | 79.25        | 70.60        | 4.39        |
| PMT [3] [ICCV'24]        | 33.84        | 26.83        | 5.35        | 34.68        | 27.60        | 5.90        | 71.81        | 62.12        | 4.54        | 71.56        | 62.06        | 4.41        |
| VCLIPSeg [8] [MICCAI'24] | 37.80        | 29.99        | 6.25        | 49.74        | 40.77        | 5.92        | 71.31        | 61.56        | 4.48        | 77.65        | 68.24        | 4.31        |
| UnCo [19] [TMI'25]       | 26.04        | 20.42        | 7.02        | 43.23        | 34.82        | 6.24        | 72.36        | 63.03        | 4.58        | 74.93        | 65.64        | 4.32        |
| SKCDF [20] [CVPR'25]     | 53.66        | 42.08        | 6.22        | 52.37        | 40.89        | 6.58        | 72.44        | 62.02        | 4.82        | 75.89        | 65.75        | 4.74        |
| CSCPA [2] [CVPR'25]      | 52.70        | 42.73        | 6.21        | 57.92        | 47.61        | 5.83        | 78.28        | 68.81        | 4.45        | 80.73        | 71.41        | 4.30        |
| <b>Ours</b>              | <b>56.07</b> | <b>45.37</b> | <b>6.20</b> | <b>61.49</b> | <b>50.85</b> | <b>5.71</b> | <b>80.25</b> | <b>68.94</b> | <b>4.44</b> | <b>83.57</b> | <b>72.21</b> | <b>4.18</b> |

074 **D. Model Complexity**

075 Tab. 3 details the efficiency comparison. The parameter in-  
076 crease is inherent to the generative paradigm. While heavier  
077 than BSNet (86.49M vs 23.6M), SemiGDA gains +12.56%  
078 Dice (75.57% vs 63.01%). Crucially, the 7.90 GB foot-  
079 print enables effortless single-GPU deployment, while 32  
080 FPS satisfies real-time requirements.

Table 3. Efficiency comparison on BUSI at  $224 \times 224$  resolution.

| Method      | Params (M) | Memory (GB) | FPS | Dice (10%)   |
|-------------|------------|-------------|-----|--------------|
| BSNet       | 23.6       | 4.2         | 164 | 63.01        |
| CSCPA       | 46.5       | 4.7         | 121 | 65.16        |
| <b>Ours</b> | 86.4       | 7.9         | 32  | <b>75.57</b> |

081 **References**

- 082 [1] Jorge Bernal, F Javier Sánchez, Gloria Fernández-Esparrach,  
083 Debora Gil, Cristina Rodríguez, and Fernando Vilariño.  
084 WM-DOVA maps for accurate polyp highlighting in  
085 colonoscopy: Validation vs. saliency maps from physicians.  
086 *Computerized Medical Imaging and Graphics*, 43:99–111,  
087 2015. 1
- 088 [2] Zhenhui Ding, Guilian Chen, Qin Zhang, Huisi Wu, and Jing  
089 Qin. Csc-pa: Cross-image semantic correlation via prototype  
090 attentions for single-network semi-supervised breast tumor  
091 segmentation. In *Proceedings of the Computer Vision and*  
092 *Pattern Recognition Conference*, pages 15632–15641, 2025.  
093 2
- 094 [3] Ning Gao, Sanping Zhou, Le Wang, and Nanning Zheng.  
095 PMT: Progressive mean teacher via exploring temporal con-  
096 sistency for semi-supervised medical image segmentation.  
097 *European Conference on Computer Vision*, 2024. 2
- 098 [4] Haifan Gong, Jiaxin Chen, Guanqi Chen, Haofeng Li, Guan-  
099 bin Li, and Fei Chen. Thyroid region prior guided attention  
100 for ultrasound segmentation of thyroid nodules. *Computers*  
101 *in Biology and Medicine*, 155:106389, 2023. 1
- 102 [5] Along He, Tao Li, Juncheng Yan, Kai Wang, and Huazhu Fu.  
103 Bilateral supervision network for semi-supervised medical  
104 image segmentation. *IEEE Transactions on Medical Imag-*  
105 *ing*, 43(5):1715–1726, 2024. 2
- 106 [6] Kaiwen Huang, Tao Zhou, Huazhu Fu, Yizhe Zhang, Yi  
107 Zhou, Chen Gong, and Dong Liang. Learnable prompt-  
108 ing sam-induced knowledge distillation for semi-supervised  
109 medical image segmentation. *IEEE Transactions on Medical*  
110 *Imaging*, 44(5):2295–2306, 2025. 1
- 111 [7] Debesh Jha, Pia H Smedsrud, Michael A Riegler, Pål  
112 Halvorsen, Thomas De Lange, Dag Johansen, and Håvard D  
113 Johansen. Kvasir-seg: A segmented polyp dataset. In *MMM*,  
114 pages 451–462. Springer, 2020. 1
- 115 [8] Lei Li, Sheng Lian, Zhiming Luo, Beizhan Wang, and Shaozi  
116 Li. Vclipseg: Voxel-wise clip-enhanced model for semi-  
117 supervised medical image segmentation. In *International*  
118 *Conference on Medical Image Computing and Computer-*  
119 *Assisted Intervention*, pages 692–701. Springer, 2024. 2
- 120 [9] Xiangde Luo, Jieneng Chen, Tao Song, and Guotai Wang.  
121 Semi-supervised medical image segmentation through dual-  
task consistency. In *Proceedings of the AAAI Conference on*  
*Artificial Intelligence*, pages 8801–8809, 2021. 2
- [10] Xiangde Luo, Guotai Wang, Wenjun Liao, Jieneng Chen,  
Tao Song, Yanan Chen, Shichuan Zhang, Dimitris N  
Metaxas, and Shaoting Zhang. Semi-supervised medical im-  
age segmentation via uncertainty rectified pyramid consis-  
tency. *Medical Image Analysis*, 80:102517, 2022. 2
- [11] Juzheng Miao, Cheng Chen, Furui Liu, Hao Wei, and Pheng-  
Ann Heng. Causl: Causality-inspired semi-supervised  
learning for medical image segmentation. In *Proceedings*  
*of the IEEE/CVF International Conference on Computer Vi-*  
*sion*, pages 21426–21437, 2023. 2
- [12] Lina Pedraza, Carlos Vargas, Fabián Narváez, Oscar Durán,  
Emma Muñoz, and Eduardo Romero. An open access thy-  
roid ultrasound image database. In *International Sympo-*  
*sium on Medical Information Processing and Analysis*, pages  
188–193. SPIE, 2015. 1
- [13] Juan Silva, Aymeric Histace, Olivier Romain, Xavier Dray,  
and Bertrand Granado. Toward embedded detection of  
polyps in wce images for early diagnosis of colorectal can-  
cer. *International Journal of Computer Assisted Radiology*  
*and Surgery*, 9:283–293, 2014. 1
- [14] Nima Tajbakhsh, Suryakanth R Gurudu, and Jianming  
Liang. Automated polyp detection in colonoscopy videos  
using shape and context information. *IEEE Transactions on*  
*Medical Imaging*, 35(2):630–644, 2015. 1
- [15] Yongchao Wang, Bin Xiao, Xiuli Bi, Weisheng Li, and  
Xinbo Gao. Mcf: Mutual correction framework for semi-  
supervised medical image segmentation. In *Proceedings of*  
*the IEEE/CVF Conference on Computer Vision and Pattern*  
*Recognition*, pages 15651–15660, 2023. 2
- [16] Yicheng Wu, Minfeng Xu, Zongyuan Ge, Jianfei Cai, and  
Lei Zhang. Semi-supervised left atrium segmentation with  
mutual consistency training. In *International Conference on*  
*Medical Image Computing and Computer-Assisted Interv-*  
*tion*, pages 297–306. Springer, 2021. 2
- [17] Tom Wunderling, B Golla, Prabal Poudel, Christoph Arens,  
Michael Friebe, and Christian Hansen. Comparison of thy-  
roid segmentation techniques for 3D ultrasound. In *Medical*  
*Imaging: Image Processing*, pages 346–352. SPIE, 2017. 1
- [18] Lequan Yu, Shujun Wang, Xiaomeng Li, Chi-Wing Fu, and  
Pheng-Ann Heng. Uncertainty-aware self-ensembling model  
for semi-supervised 3D left atrium segmentation. In *In-*  
*ternational Conference on Medical Image Computing and*  
*Computer-Assisted Intervention*, pages 605–613. Springer,  
2019. 2
- [19] Xiang Zeng, Shengwu Xiong, Jinming Xu, Guangxing Du,  
and Yi Rong. Uncertainty co-estimator for improving semi-  
supervised medical image segmentation. *IEEE Transactions*  
*on Medical Imaging*, 44(9):3870–3881, 2025. 2
- [20] Zheng Zhang, Guanchun Yin, et al. A semantic knowledge  
complementarity based decoupling framework for semi-  
supervised class-imbalanced medical image segmentation.  
In *Proceedings of the Computer Vision and Pattern Recog-*  
*nition Conference*, pages 25940–25949, 2025. 2
- [21] Lanfeng Zhong, Xin Liao, Shaoting Zhang, and Guotai  
Wang. Semi-supervised pathological image segmentation

179 via cross distillation of multiple attentions. In *International*  
180 *Conference on Medical Image Computing and Computer-*  
181 *Assisted Intervention*, pages 570–579. Springer, 2023. 2
